# Supplementary material for: tRNA-derived small RNAs are embedded in the gene regulatory network instructingDrosophilametamorphosis
Source: HighWire-hosted journal article supplement (doi:10.1101/gr.278128.123), 2023-11-16
Supplement: Supplemental_Table_S1.xlsx [file Supplemental_Table_S1.xlsx]

## Sheet: Sheet1
Supplemental Table S1. Mapping statistics.
For mim-tRNA/tsRNA-seq, E. coli tRNALysUUU was spiked in the total RNA extracts. For PANDORA-seq, 2S rRNA was used as an internal control for quantification.
(A) mim-tRNA-seq
Sample	tRNA_uniq	tRNA_multi	E. coli tRNALysUUU
tRNA_L3_R1	23343750	159817	310701
tRNA_L3_R2	15512274	113839	223251
tRNA_L3_R3	6143205	48000	87284
tRNA_P1_R1	4903712	100270	80093
tRNA_P1_R2	14506060	200463	196214
tRNA_P2_R1	6441766	167133	79434
tRNA_P2_R2	4007929	110252	46249
tRNA_P2_R3	4073944	182452	53749
(B) mim-tsRNA-seq
Sample	tRNA_uniq	tRNA_multi	E. coli tRNALysUUU	2S rRNA
tsRNA_L3_R1	257832	13997	7350	570012
tsRNA_L3_R2	202522	16093	9874	153358
tsRNA_L3_R3	553589	29077	18413	308084
tsRNA_P1_R1	748015	31621	7281	106290
tsRNA_P1_R2	4240375	132271	15795	233521
tsRNA_P2_R1	2199850	65826	10653	684997
tsRNA_P2_R2	989829	36454	9245	130698
tsRNA_P2_R3	3331692	147851	16210	434355
(C) PANDORA-seq
Sample	tRNA	rRNA	miRNA	piRNA	2S rRNA
brain_L3	1853347	10411619	370150	608110	1094403
wingdisc_L3	1320309	8819860	99586	229053	805923
fatbody_L3	580086	12925959	29814	274587	691412
gut_L3	2844271	11906557	33370	1213819	898186
carcass_L3	2096245	12898177	152036	856417	944623
head_P1	6589207	29947226	309811	1961707	599437
thorax_P1	6376557	30735764	334509	1823575	345586
abdomen_P1	5109059	26916599	198958	1374813	139898
wholebody_P2_R1	1365405	15955932	215902	400036	448166
wholebody_P2_R2	1551637	18566177	244440	459226	578637
Scr_pan_R1	1959831	13258853	76204	177375	282770
Scr_pan_R2	1575135	12130321	63442	149726	293510
Asp_pan_R1	1514537	14151542	28964	123197	255623
Asp_pan_R2	2002166	19897705	57773	218331	326506
(D) mRNA-seq
Sample	Total	genome_uniq	genome_multi
w1118_L3_R1	22177294	15680144	5177738
w1118_L3_R2	24523155	20984110	1940532
w1118_L3_R3	25405523	16891014	1148790
Asp_L3_R1	22614816	19215366	1631894
Asp_L3_R2	24577793	20126102	2521024
scramble_1_L3	22069377	13371802	986175
scramble_2_L3	22834654	15257815	538364
w1118_P1_R1	25894520	17103399	425463
w1118_P1_R2	23486241	15561693	1083424
scramble_P1_R1	24908164	21978750	464534
scramble_P1_R2	21724441	19300061	466878
Asp_P1_R1	21159475	18652362	993799
Asp_P1_R2	21262332	17838250	756733
w1118_P2_R1	24051548	20557566	841940
w1118_P2_R2	22032545	18234804	851698
Gly_P2_R1	23442707	19783164	764003
Gly_P2_R2	31625676	26870487	1181362
Glu_P2_R1	33262233	28642019	1005402
Glu_P2_R2	24676240	19783164	2244432
Pro_P2_R1	26689305	20846006	860159
Pro_P2_R2	23314951	17420716	1002040
Lys_P2_R1	24295411	20296843	1300488
Lys_P2_R2	25370649	20960462	1373724
Rescue_Asp_R1	22570394	18966865	811663
Rescue_Asp_R2	23994930	20291531	1038286
(E) Ribo-seq
Sample	rRNA	tRNA	mRNA	mRNA (26-34nt)
L3_R1	21236325	177734	3322745	2444936
L3_R2	27645836	1908093	6986786	5322149
L3_R3	12873729	2692693	8487222	6639216
P1_R1	31747551	10003166	6987075	5754565
P1_R2	29696630	2253990	1468602	1130336
P2_R1	35630322	3007983	2686731	2180753
P2_R2	32893062	6911329	8551237	6485046
Scr_ribo_R1	19805990	3486627	2231501	1662277
Scr_ribo_R2	14141832	2809048	1081642	784602
Asp_ribo_R1	26614061	3198302	2475424	1942192
Asp_ribo_R2	23479981	6480403	3135348	2513526
(F) RiboTag-seq. Samples from Desat1-GAL4/CyO; UAS-RPL13A-FLAG/UAS-scrambled 5’-tsRNAAspGUC-sponge were denoted as Scr. Samples from Desat1-GAL4/CyO; UAS-RPL13A-FLAG/UAS-5’-tsRNAAspGUC-sponge were denoted as Asp.
Sample	Total	genome_uniq	genome_multi
Scr_R1	63090475	37858330	15415014
Scr_R2	55992619	33186382	13914154
Asp_R1	120053271	56812150	48841838
Asp_R2	68953158	32224451	28523769
