# Supplementary material for: tRNA-derived small RNAs are embedded in the gene regulatory network instructingDrosophilametamorphosis
Source: HighWire-hosted journal article supplement (doi:10.1101/gr.278128.123), 2023-11-16
Supplement: Supplemental_Table_S2.xlsx [file Supplemental_Table_S2.xlsx]

## Sheet: Sheet1
Supplemental Table S2. Sequences of tsRNA sponge elements.
Each sponge element consists of ten repetitive sequences (black) that are complementary to a tsRNA of interest. A ‘CGCG’ linker is added to separate the consecutive repeats. The XhoI and XbaI sites for fragment insertion into the attB vector are in blue.
Sponge against	Sequence
5’-tsRNAGlyGCC	CTCGAGCGCGAGGCGAGCATTCTACCACTGAACCACCGATGCCGCGAGGCGAGCATTCTACCACTGAACCACCGATGCCGCGAGGCGAGCATTCTACCACTGAACCACCGATGCCGCGAGGCGAGCATTCTACCACTGAACCACCGATGCCGCGAGGCGAGCATTCTACCACTGAACCACCGATGCCGCGAGGCGAGCATTCTACCACTGAACCACCGATGCCGCGAGGCGAGCATTCTACCACTGAACCACCGATGCCGCGAGGCGAGCATTCTACCACTGAACCACCGATGCCGCGAGGCGAGCATTCTACCACTGAACCACCGATGCCGCGAGGCGAGCATTCTACCACTGAACCACCGATGCCGCGTCTAGA
5’-tsRNAGluCUC	CTCGAGCGCGAGCCGGATATCCTAACCACTAGACAATATGGGACGCGAGCCGGATATCCTAACCACTAGACAATATGGGACGCGAGCCGGATATCCTAACCACTAGACAATATGGGACGCGAGCCGGATATCCTAACCACTAGACAATATGGGACGCGAGCCGGATATCCTAACCACTAGACAATATGGGACGCGAGCCGGATATCCTAACCACTAGACAATATGGGACGCGAGCCGGATATCCTAACCACTAGACAATATGGGACGCGAGCCGGATATCCTAACCACTAGACAATATGGGACGCGAGCCGGATATCCTAACCACTAGACAATATGGGACGCGAGCCGGATATCCTAACCACTAGACAATATGGGACGCGTCTAGA
5’-tsRNAProUGG	CTCGAGCGCGAAGCGAGAATCATACCCCTAGACCATTGAGCCCGCGAAGCGAGAATCATACCCCTAGACCATTGAGCCCGCGAAGCGAGAATCATACCCCTAGACCATTGAGCCCGCGAAGCGAGAATCATACCCCTAGACCATTGAGCCCGCGAAGCGAGAATCATACCCCTAGACCATTGAGCCCGCGAAGCGAGAATCATACCCCTAGACCATTGAGCCCGCGAAGCGAGAATCATACCCCTAGACCATTGAGCCCGCGAAGCGAGAATCATACCCCTAGACCATTGAGCCCGCGAAGCGAGAATCATACCCCTAGACCATTGAGCCCGCGAAGCGAGAATCATACCCCTAGACCATTGAGCCCGCGTCTAGA
5’-tsRNAAspGUC	CTCGAGCGCGGGGGATACTAACCACTATACTATCGAGGACGCGGGGGATACTAACCACTATACTATCGAGGACGCGGGGGATACTAACCACTATACTATCGAGGACGCGGGGGATACTAACCACTATACTATCGAGGACGCGGGGGATACTAACCACTATACTATCGAGGACGCGGGGGATACTAACCACTATACTATCGAGGACGCGGGGGATACTAACCACTATACTATCGAGGACGCGGGGGATACTAACCACTATACTATCGAGGACGCGGGGGATACTAACCACTATACTATCGAGGACGCGGGGGATACTAACCACTATACTATCGAGGACGCGTCTAGA
5’-tsRNALysUUU	CTCGAGCGCGAGTCCAATGCTCTACCGACTGAGCTATCCGGGCCGCGAGTCCAATGCTCTACCGACTGAGCTATCCGGGCCGCGAGTCCAATGCTCTACCGACTGAGCTATCCGGGCCGCGAGTCCAATGCTCTACCGACTGAGCTATCCGGGCCGCGAGTCCAATGCTCTACCGACTGAGCTATCCGGGCCGCGAGTCCAATGCTCTACCGACTGAGCTATCCGGGCCGCGAGTCCAATGCTCTACCGACTGAGCTATCCGGGCCGCGAGTCCAATGCTCTACCGACTGAGCTATCCGGGCCGCGAGTCCAATGCTCTACCGACTGAGCTATCCGGGCCGCGAGTCCAATGCTCTACCGACTGAGCTATCCGGGCCGCGTCTAGA
a sequence scrambled from 5’-tsRNAAspGUC	CTCGAGCGCGATAAGAGACGTGATCACATGCCAGCTAGTCGCGATAAGAGACGTGATCACATGCCAGCTAGTCGCGATAAGAGACGTGATCACATGCCAGCTAGTCGCGATAAGAGACGTGATCACATGCCAGCTAGTCGCGATAAGAGACGTGATCACATGCCAGCTAGTCGCGATAAGAGACGTGATCACATGCCAGCTAGTCGCGATAAGAGACGTGATCACATGCCAGCTAGTCGCGATAAGAGACGTGATCACATGCCAGCTAGTCGCGATAAGAGACGTGATCACATGCCAGCTAGTCGCGATAAGAGACGTGATCACATGCCAGCTAGTCGCGTCTAGA
