# Supplementary material for: tRNA-derived small RNAs are embedded in the gene regulatory network instructingDrosophilametamorphosis
Source: HighWire-hosted journal article supplement (doi:10.1101/gr.278128.123), 2023-11-16
Supplement: Supplemental_Table_S3.xlsx [file Supplemental_Table_S3.xlsx]

## Sheet: Sheet1
Supplemental Table S3. Synthetic single-stranded RNA oligos.
Symbols	Sequence
5’-tsRNAGlyGCC	GCAUCGGUGGUUCAGUGGUAGAAUGCUCGCCU
5’-tsRNAGluCUC	UCCCAUAUUGUCUAGUGGUUAGGAUAUCCGGCU
5’-tsRNAProUGG	GGCUCAAUGGUCUAGGGGUAUGAUUCUCGCUU
5’-tsRNAAspGUC	UCCUCGAUAGUAUAGUGGUUAGUAUCCCC
E. coli tRNALysUUU	GGGUCGUUAGCUCAGUUGGUAGAGCAGUUGACUUUUAAUCAAUUGGUCGCAGGUUCGAAUCCUGCACGACCCACC
