# Supplementary material for: tRNA-derived small RNAs are embedded in the gene regulatory network instructingDrosophilametamorphosis
Source: HighWire-hosted journal article supplement (doi:10.1101/gr.278128.123), 2023-11-16
Supplement: Supplemental_Table_S4.xlsx [file Supplemental_Table_S4.xlsx]

## Sheet: Sheet1
Supplemental Table S4. Primers for amplification of pre-tRNA gene sequences.
Each pair of primers was designed to amplify the genomic sequence of a specific tRNA locus: tRNA:Gly-GCC-1-1 (FBgn0011859, chromosome 2L 1938089..1938159, - strand), tRNA:Glu-CUC-3-4 (FBgn0011851, chromosome 3L 1397695..1397766, + strand), tRNA:Asp-GUC-1-6 (FBgn0051602, chromosome 2L 8620028-8620099, + strand), and tRNA:Pro-UGG-1-1 (FBgn0011944, chromosome 3R 17618110..17618181, - strand). The PC…
Primer	Sequence
pre-tRNAGlyGCC-F	TGGTTTTCTTGTTGAGTGGTGTG
pre-tRNAGlyGCC-R	ATTCAACCGTGTGTTGCCATTT
pre-tRNAGluCUC-F	TATGTGCCTCATTCGCAGCC
pre-tRNAGluCUC-R	TGACATTCTTGCATTCAGTGTTGG
pre-tRNAProUGG-F	AGTTCATTTGGCGGTGGCTA
pre-tRNAProUGG-R	CGATTTGTTTTCGCCCGGG
pre-tRNAAspGUC-F	GCCCCTTTATTGTAGTACGTT
pre-tRNAAspGUC-R	CGTTATTCTTTCGCAAGCAA
