# Supplementary material for: tRNA-derived small RNAs are embedded in the gene regulatory network instructingDrosophilametamorphosis
Source: HighWire-hosted journal article supplement (doi:10.1101/gr.278128.123), 2023-11-16
Supplement: Supplemental_Table_S5.xlsx [file Supplemental_Table_S5.xlsx]

## Sheet: Sheet1
Supplemental Table S5. Sequences carrying the native or scrambled target sites of the examined tsRNAs to be incorporated in the Renilla reporter gene.
The 7-mer seed matches (WT) are shown in red and their scrambled versions (MT) are shown in blue.
Target site of	Sequence
5’-tsRNAGlyGCC_WT	CCAGCTGCCCTGCCCACCGATGATGCACTCCAACCCGGTGGATGCCACCGATGGCTACGACCGCATGCTACCGCCACCGATGGCTGAAAA
5’-tsRNAGlyGCC_MT	CCAGCTGCCCTGCCCGACGACTATGCACTCCAACCCGGTGGATGCCGACGACTGCTACGACCGCATGCTACCGCCGACGACTGCTGAAAA
5’-tsRNAGluCUC _WT	CGCGCGAGATGGCCAATATGGGTGTTTCTCTCTATTATGAACGCAATATGGGCAAGAACTACCTATGCCTGGCACAATATGGGCATCTTT
5’-tsRNAGluCUC_MT	CGCGCGAGATGGCCAGTGAGTATGTTTCTCTCTATTATGAACGCAGTGAGTACAAGAACTACCTATGCCTGGCACAGTGAGTACATCTTT
5’-tsRNAProUGG_WT	AAGACCGCCGAGAACATTGAGCTGGTAGAGGCTGCAAAGGATCCTCATTGAGCGCTGCTTACAACAGAGTCTGGCATTGAGCTTAAGGAG
5’-tsRNAProUGG_MT	AAGACCGCCGAGAACTGATGACTGGTAGAGGCTGCAAAGGATCCTCTGATGACGCTGCTTACAACAGAGTCTGGCTGATGACTTAAGGAG
5’-tsRNAAspGUC_WT	CCGGAGAGCAGCAACATCGAGGAGTTCAAGTTCTTCTTGGCTCCCATCGAGGGATTCACAGTGCCCCTGGACTCCATCGAGGCCTGTGCC
5’-tsRNAAspGUC_MT	CCGGAGAGCAGCAACAAGGCTGAGTTCAAGTTCTTCTTGGCTCCCAAGGCTGGATTCACAGTGCCCCTGGACTCCAAGGCTGCCTGTGCC
