# Supplementary material for: tRNA-derived small RNAs are embedded in the gene regulatory network instructingDrosophilametamorphosis
Source: HighWire-hosted journal article supplement (doi:10.1101/gr.278128.123), 2023-11-16
Supplement: Supplemental_Table_S6.xlsx [file Supplemental_Table_S6.xlsx]

## Sheet: Sheet1
Supplemental Table S6. Primers for qRT-PCR.
Gene of interest	Sequence
Renila-F	TGGCCCGAAGGTAGGCGTTG
Renila-R	GAGGAGTTCGCTGCCTACCTG
Firefly-F	GATTTGCGGCTTTCGGGTGGT
Firefly-R	ACTTGTCGATCAGGGTGCTCT
rp49-F	GCTAAGCTGTCGCACAAA
rp49-R	TCCGGTGGGCAGCATGTG
Arc1-F	GCAGAGGCAAAGGCAACTTC
Arc1-R	AAGGTATGGACACTGTGGCG
FANS1-F	GAGCAACAACAGCCCACTTG
FANS1-R	CGACGGATCATCAGACCCTG
FASN2-F	GTCTATCTAGCGGGGCACAC
FASN2-R	CGCCGAAATATCCGACTCCA
tRNAAspGUC-F	TCCTCGATAGTATAGTGGTT
tRNAAspGUC-R	CTCCCCGACGGGGAATTGAA
