# Supplementary material for: tRNA-derived small RNAs are embedded in the gene regulatory network instructingDrosophilametamorphosis
Source: HighWire-hosted journal article supplement (doi:10.1101/gr.278128.123), 2023-11-16
Supplement: Supplemental_Table_S7.xlsx [file Supplemental_Table_S7.xlsx]

## Sheet: Sheet1
Supplemental Table S7. 5’ Digoxigenin-labeled probes for Northern blot analyses.
Probe against	Sequence
2S rRNA	TACAACCCTCAACCATATGTAGTCCAAGCA
5S rRNA	CGGACGAGAACCGATGTATTCAGCGTGGTATGGTCGTTGGC
5’-tsRNAGlyGCC	AGGCGAGCATTCTACCACTGAACCACCGATGC
5’-tsRNAGluCUC	AGCCGGATATCCTAACCACTAGACAATATGGGA
5’-tsRNAProUGG	AAGCGAGAATCATACCCCTAGACCATTGAGCC
5’-tsRNAAspGUC	GGGGATACTAACCACTATACTATCGAGGA
5’-tsRNALysUUU	AGTCCAATGCTCTACCGACTGAGCTATCCGGGC
3’-tsRNAAspGUC	CTCCCCGACGGGGAATTGAACCCCGGTCT
